# Supplementary material
Source: Springer Nature journal article supplement (https://www.springermedizin.de/resource/supplementary/12935_2007_178_MOESM11_ESM.pdf/9541260)

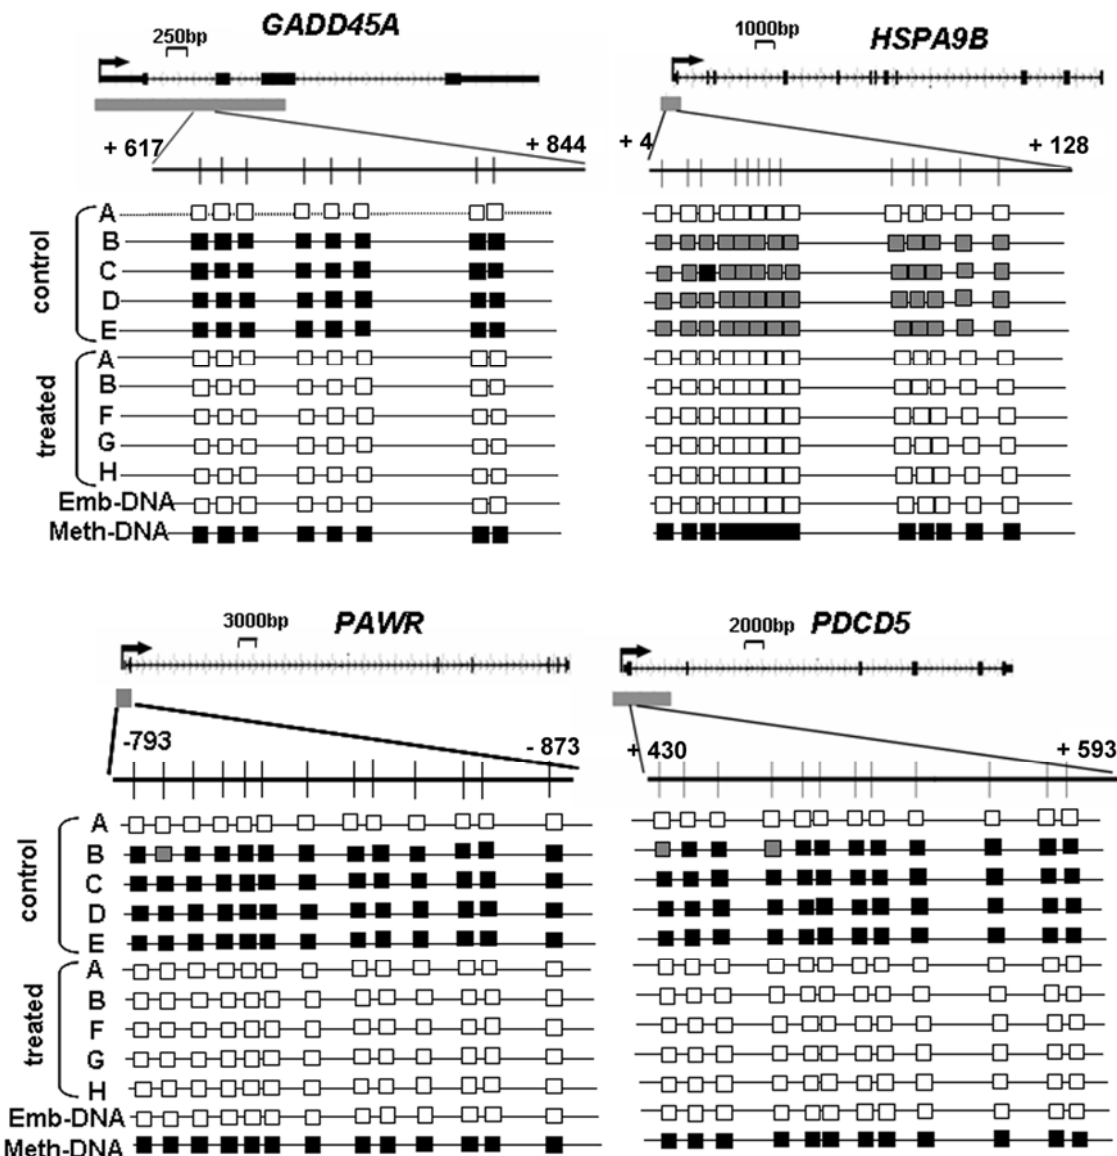

A= NH0st; B= U2OS; C= Xeno-1; D= Xeno-2; E= Xeno-3; F= Xeno-4; G= Xeno-5; H= Xeno-6;  
 Emb-DNA= DNA from early embryo; Meth-DNA= Universally methylated DNA.

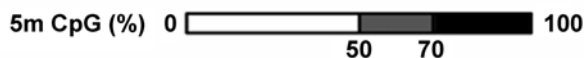

Supplement: MOESM11 [file 9541260]
